# Supplementary material for: Radiolysis of crown ether–ionic liquid systems: identification of radiolytic products and their effect on the removal of Sr2+ from nitric acid
Source: Royal Society of Chemistry journal article supplement (doi:10.1039/c4cp04294h), 2014-12-11
Supplement: c4cp04294h1.pdf [file c4cp04294h1.pdf]

## Supporting Information

# Radiolysis of crown ether/ionic liquid systems: identification of radiolytic products and their effect on the removal of $\text{Sr}^{2+}$ from nitric acid

Yinyong Ao,<sup>a</sup> Weijin Yuan,<sup>b</sup> Tianlin Yu,<sup>a</sup> Jing Peng,<sup>a</sup> Jiuqiang Li,<sup>a</sup> Maolin Zhai,<sup>a\*</sup> and Long Zhao<sup>b\*</sup>

<sup>a</sup> Beijing National Laboratory for Molecular Sciences, Radiochemistry and Radiation Chemistry Key Laboratory for Fundamental Science, College of Chemistry and Molecular Engineering, Peking University, Beijing 100871, China

<sup>b</sup> Nuclear Chemical Engineering Laboratory, School of Nuclear Science and Engineering, Shanghai Jiao Tong University, Shanghai 200240, P. R. China

\* Corresponding authors: Tel/Fax: +86-10-62753794, E-mail: mlzhai@pku.edu.cn; Tel/Fax: +86-21-34207654, ryuuchou@sjtu.edu.cn.

### Page No. Contents

|       |                                                                                                                                 |
|-------|---------------------------------------------------------------------------------------------------------------------------------|
| S – 2 | Fig.S1 High-resolution ESI-MS spectra of DtBuCH18C6/[C4mim][NTf <sub>2</sub> ] before (a) and after irradiation at 500 kGy (b). |
| S – 3 | Fig.S2 High-resolution ESI-MS spectra of B18C6/[C4mim][NTf <sub>2</sub> ] before (a) and after irradiation at 500 kGy (b).      |
| S – 4 | Fig.S3 Influence of equilibrium time on $E_{\text{Sr}}$ of crown ether/[C4mim][NTf <sub>2</sub> ] system.                       |
| S – 5 | Table S1. $D_{\text{Sr}}$ and $E_{\text{Sr}}$ of crown ether/[C4mim][NTf <sub>2</sub> ] system depending on equilibrium time.   |
| S – 5 | Fig.S4 Influence of dose on $\text{Sr}^{2+}$ extraction by crown ether/[C4mim][NTf <sub>2</sub> ] system.                       |
| S – 6 | Table S2. $D_{\text{Sr}}$ and $E_{\text{Sr}}$ of crown ether/[C4mim][NTf <sub>2</sub> ] system before and after irradiation.    |

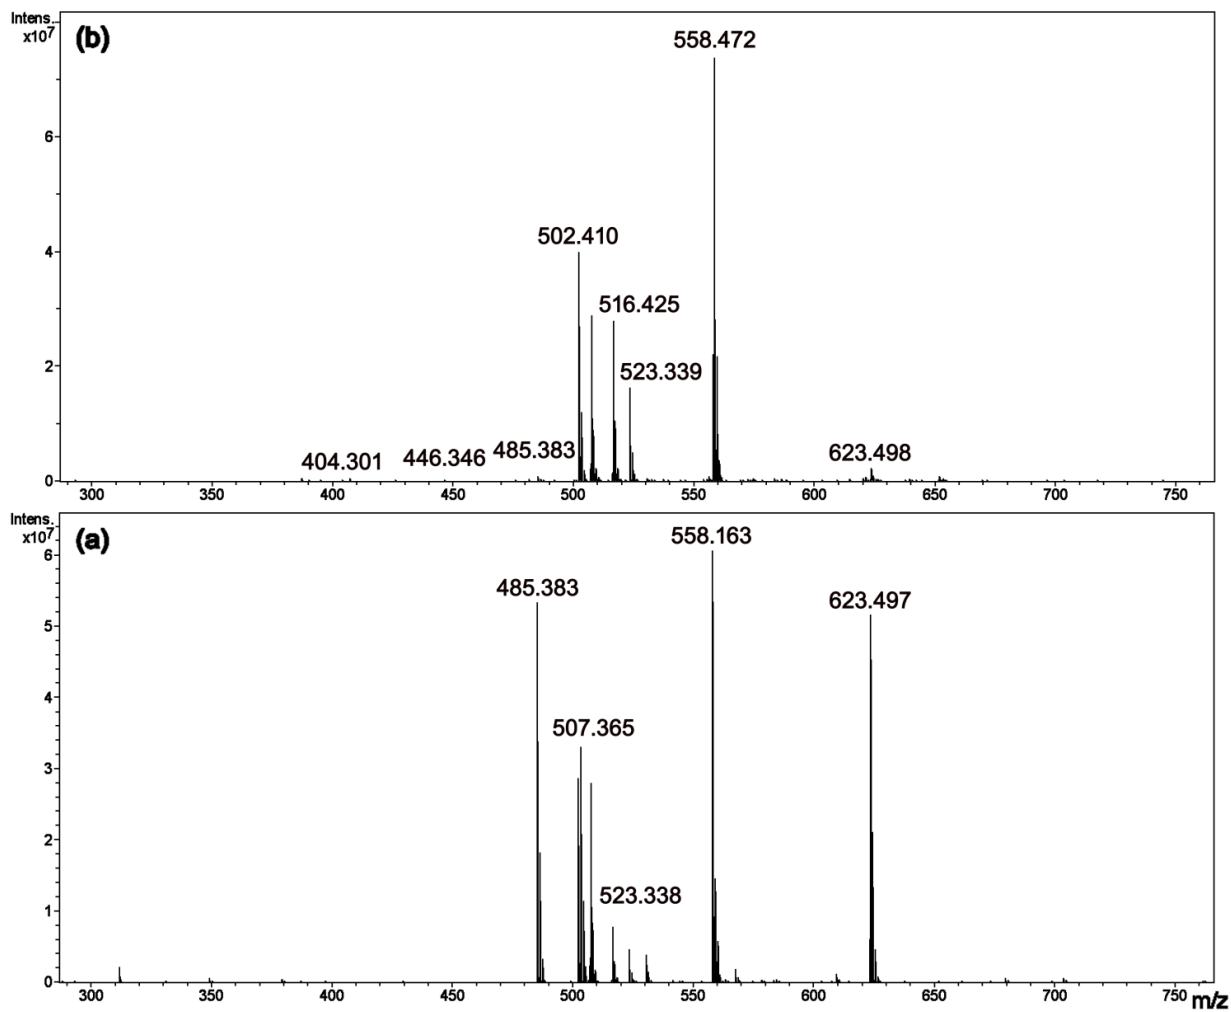

Fig.S1 High-resolution ESI-MS spectra of DtBuCH18C6/[C<sub>4</sub>mim][NTf<sub>2</sub>] before (a) and after irradiation at 500 kGy (b).

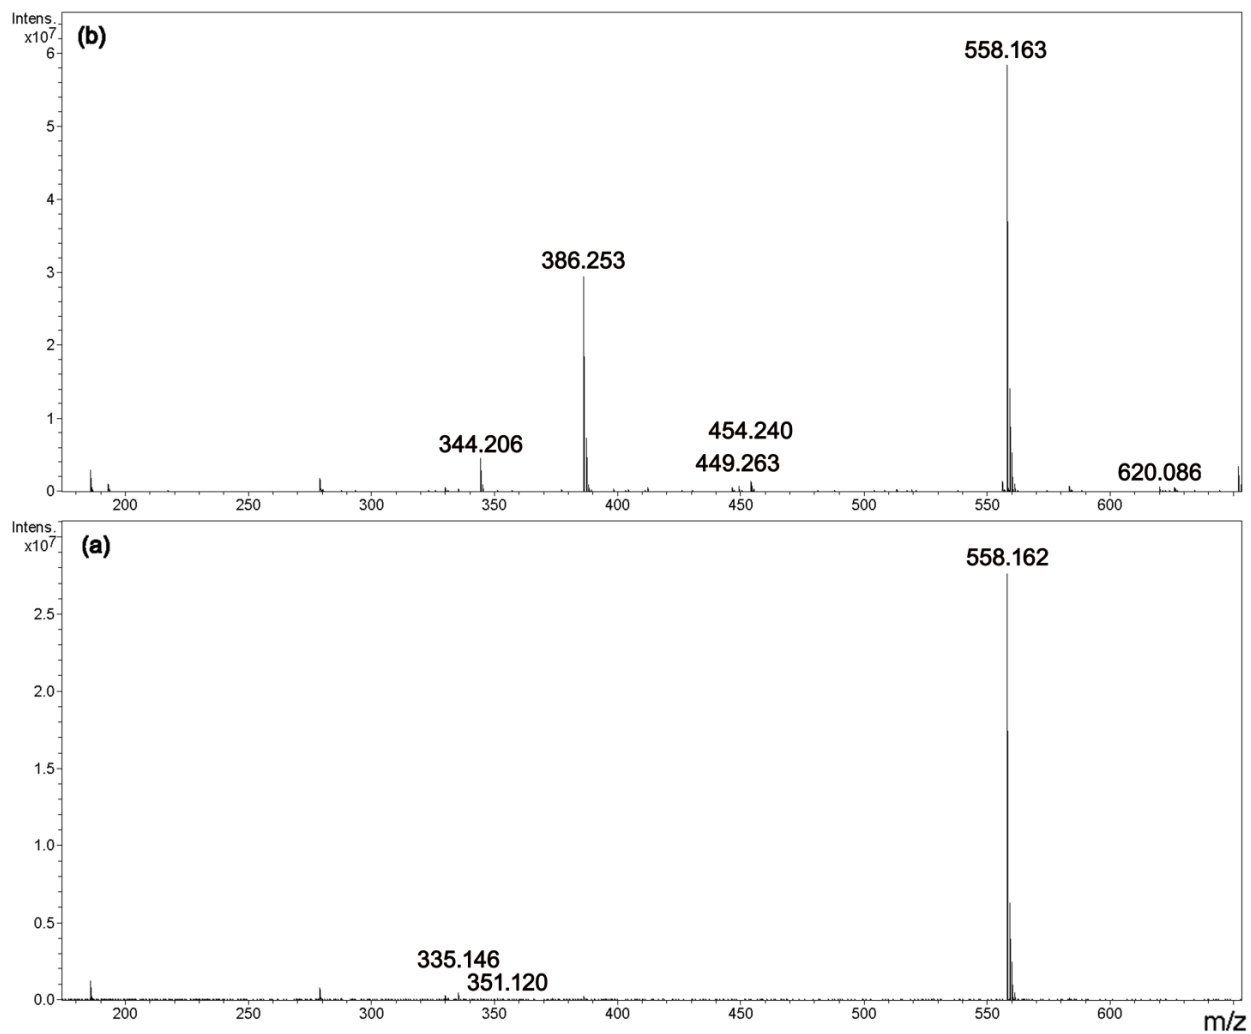

Fig.S2 High-resolution ESI-MS spectra of B18C6/[C<sub>4</sub>mim][NTf<sub>2</sub>] before (a) and after irradiation at 500 kGy (b).

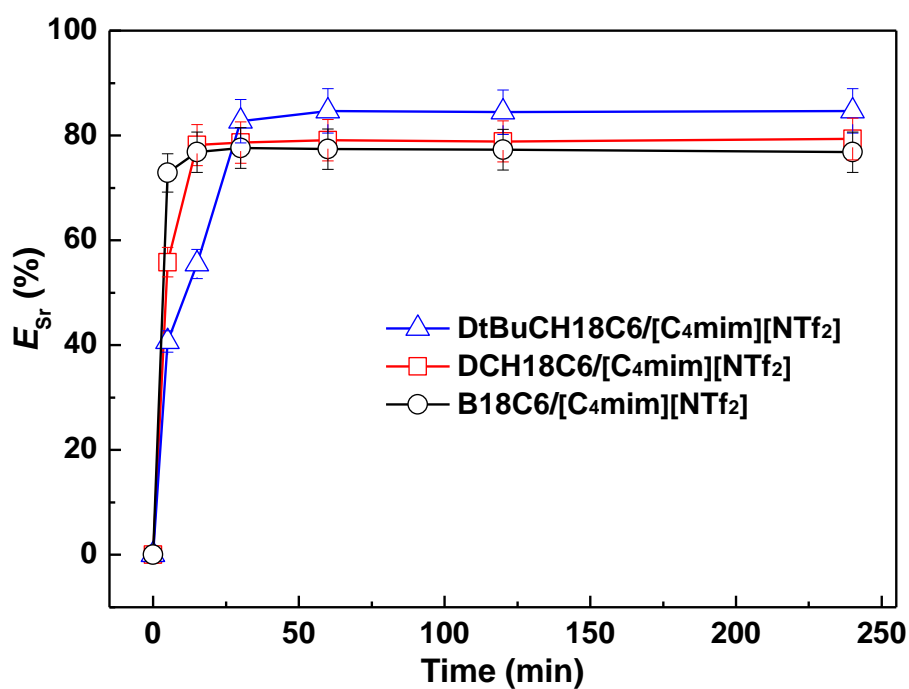

Fig.S3 Influence of equilibrium time on  $E_{Sr}$  of crown ether/[C<sub>4</sub>mim][NTf<sub>2</sub>] system. (DCH18C6/[C<sub>4</sub>mim][NTf<sub>2</sub>] (□); DtBuCH18C6/[C<sub>4</sub>mim][NTf<sub>2</sub>] (△); B18C6/[C<sub>4</sub>mim][NTf<sub>2</sub>] (O))

Table S1.  $D_{Sr}$  and  $E_{Sr}$  of crown ether/[C<sub>4</sub>mim][NTf<sub>2</sub>] system depending on equilibrium time. ([Crown ether]: 0.1 M; [Sr<sup>2+</sup>]: 0.01 M; [HNO<sub>3</sub>]: 3 M)

| Time (min) | DCH18C6/[C <sub>4</sub> mim][NTf <sub>2</sub> ] |              | DtBuCH18C6/[C <sub>4</sub> mim][NTf <sub>2</sub> ] |              | B18C6/[C <sub>4</sub> mim][NTf <sub>2</sub> ] |              |
|------------|-------------------------------------------------|--------------|----------------------------------------------------|--------------|-----------------------------------------------|--------------|
|            | $D_{Sr}$                                        | $E_{Sr}$ (%) | $D_{Sr}$                                           | $E_{Sr}$ (%) | $D_{Sr}$                                      | $E_{Sr}$ (%) |
| 0          | 0                                               | 0            | 0                                                  | 0            | 0                                             | 0            |
| 5          | 1.26                                            | 55.8         | 0.68                                               | 40.7         | 2.65                                          | 72.9         |
| 15         | 3.61                                            | 78.2         | 1.24                                               | 55.5         | 3.33                                          | 76.8         |
| 30         | 3.69                                            | 78.7         | 4.80                                               | 82.7         | 3.46                                          | 77.6         |
| 60         | 3.81                                            | 79.1         | 5.51                                               | 84.7         | 3.44                                          | 77.4         |
| 120        | 3.77                                            | 78.9         | 5.41                                               | 84.4         | 3.44                                          | 77.3         |
| 240        | 3.83                                            | 79.3         | 5.56                                               | 84.7         | 3.34                                          | 76.8         |

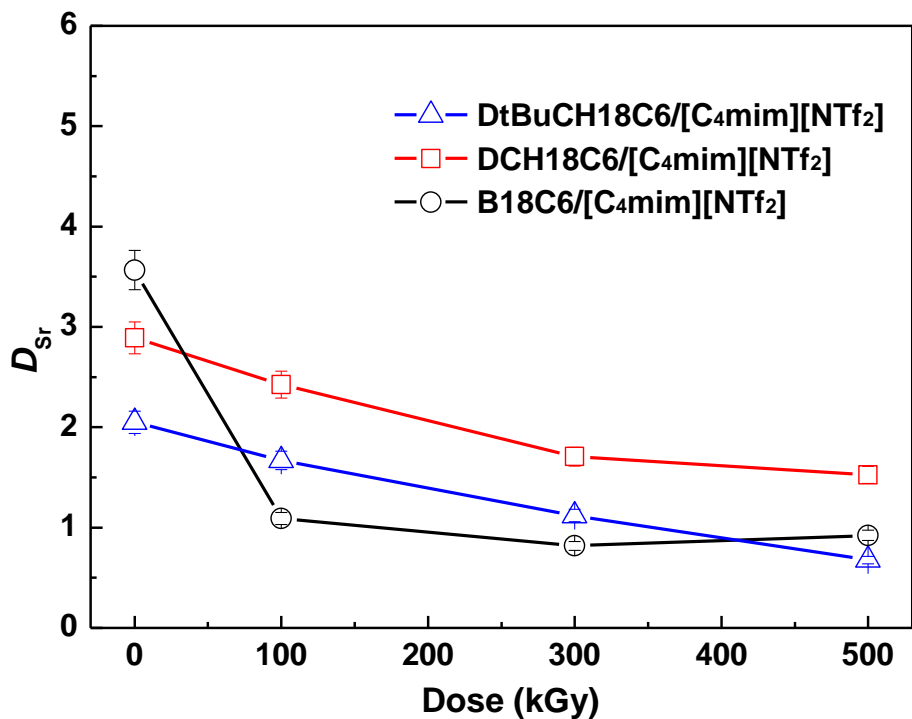

Fig.S4 Influence of dose on  $Sr^{2+}$  extraction by crown ether/[C<sub>4</sub>mim][NTf<sub>2</sub>] system.

([Crown ether]: 0.1 M; [Sr<sup>2+</sup>]: 0.05 M; [HNO<sub>3</sub>]: 3 M)

Table S2.  $D_{Sr}$  and  $E_{Sr}$  of crown ether/[C<sub>4</sub>mim][NTf<sub>2</sub>] system before and after irradiation.

([Crown ether]: 0.1 M; [Sr<sup>2+</sup>]: 0.05 M; [HNO<sub>3</sub>]: 3 M)

| Dose<br>(kGy) | DCH18C6/[C <sub>4</sub> mim][NTf <sub>2</sub> ] |              | DtBuCH18C6/[C <sub>4</sub> mim][NTf <sub>2</sub> ] |              | B18C6/[C <sub>4</sub> mim][NTf <sub>2</sub> ] |              |
|---------------|-------------------------------------------------|--------------|----------------------------------------------------|--------------|-----------------------------------------------|--------------|
|               | $D_{Sr}$                                        | $E_{Sr}$ (%) | $D_{Sr}$                                           | $E_{Sr}$ (%) | $D_{Sr}$                                      | $E_{Sr}$ (%) |
| 0             | 2.89                                            | 74.1         | 2.05                                               | 67.0         | 3.57                                          | 78.0         |
| 100           | 2.42                                            | 70.8         | 1.67                                               | 62.2         | 1.09                                          | 52.5         |
| 300           | 1.71                                            | 63.3         | 1.12                                               | 52.4         | 0.82                                          | 45.3         |
| 500           | 1.52                                            | 60.3         | 0.68                                               | 40.0         | 0.90                                          | 48.0         |
